# Supplementary material for: Pilot Clinical Study Investigating the Thermal Physiology of Breast Cancer via High-Resolution Infrared Imaging
Source: MDPI journal article supplement (doi:10.3390/bioengineering8070086), 2021-06-22
Supplement: s1 [file s1]

## Supplementary Materials

Figure S1: Static IR images indicating generalized regions of interest (ROIs) for Subjects 01–11.

Figure S2: Static IR images indicating localized regions of interest (ROIs) for Subjects 01–11.

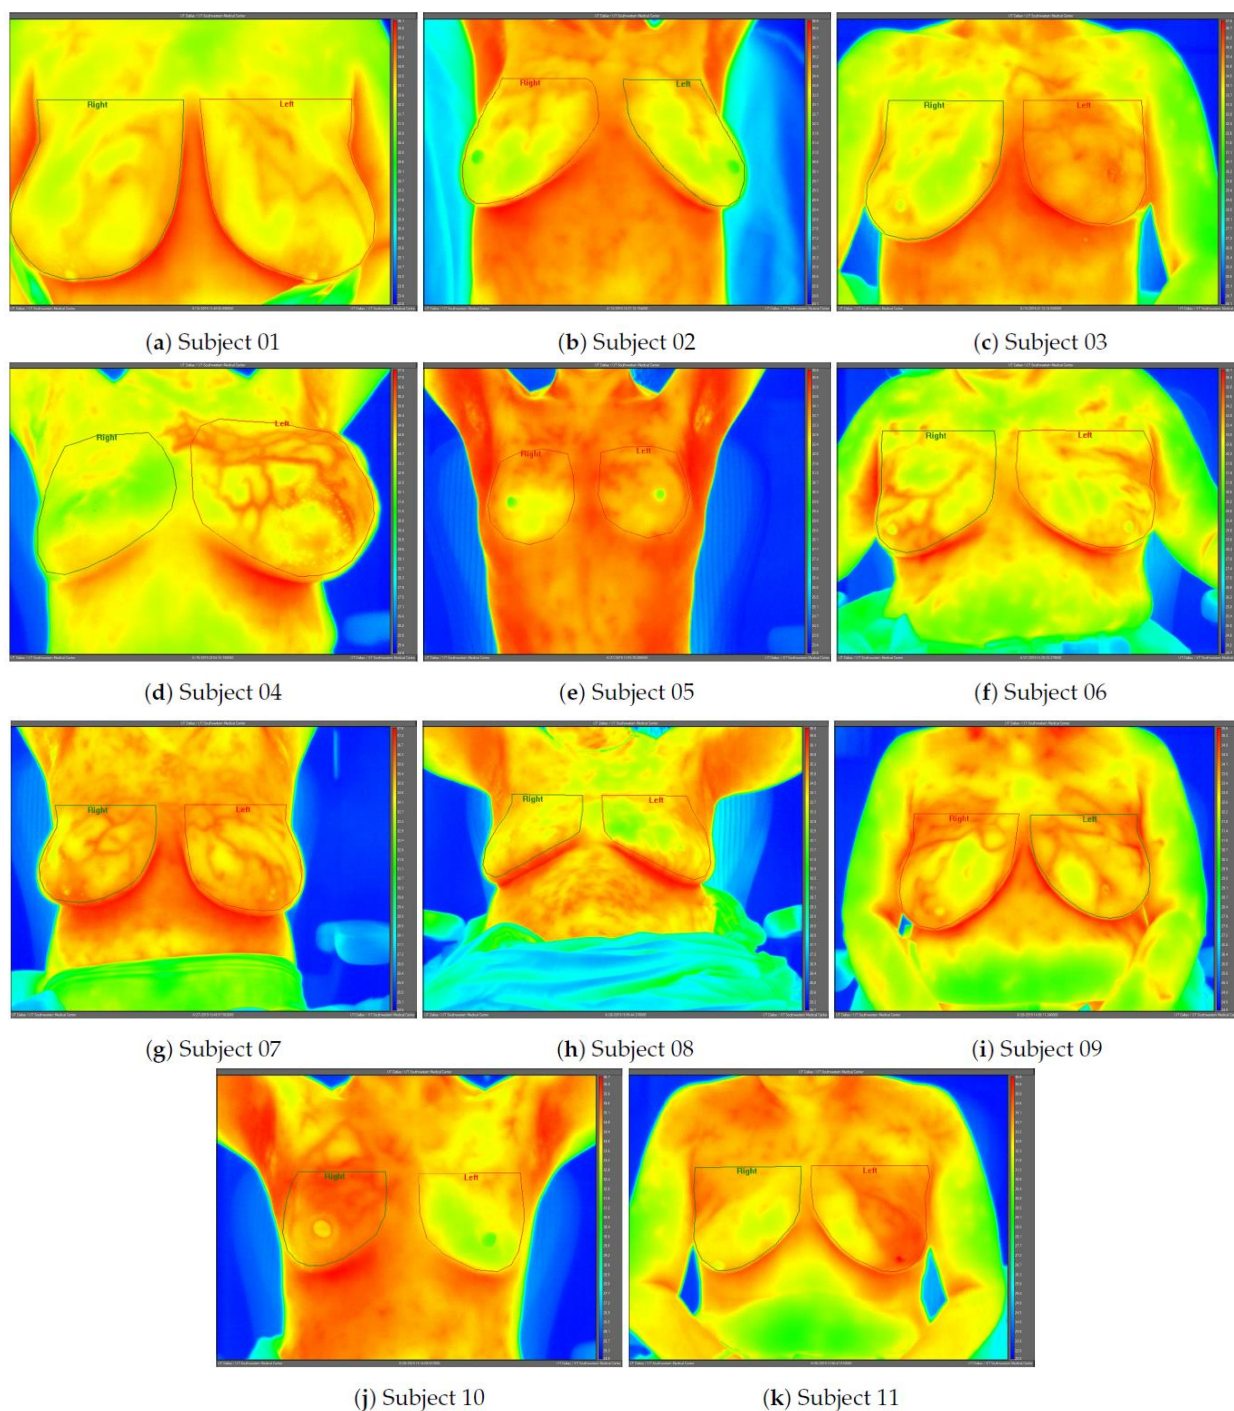

**Figure S1.** Generalized regions of interest (ROIs) for Subjects 01–11 as outlined in Table 2. Generalized ROIs were drawn over the entire breast from subjects' frontal view IR images. Red and green ROI colors shown are arbitrary and have no significance.

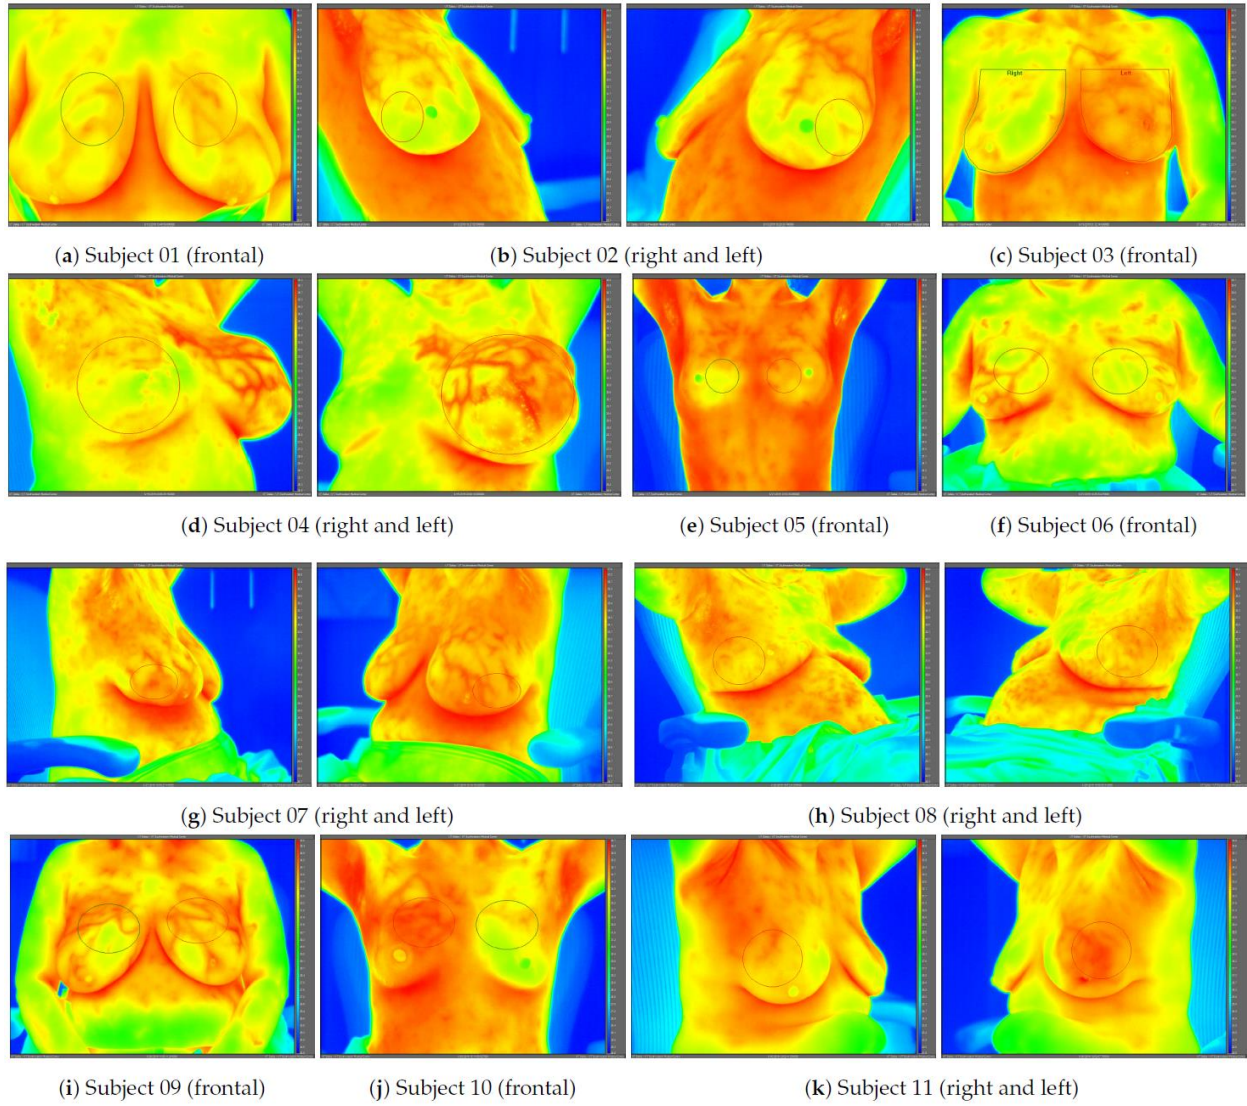

**Figure S2.** Localized regions of interest (ROIs) for Subjects 01–11 as outlined in Table 2. Localized ROIs were drawn around individual breast lesions as identified from subjects' radiologic imaging from subjects' frontal view or side view IR images (with the exception of Subject 03 whose localized ROI was identical to the generalized ROI because the lesion was widespread). Red and green ROI colors shown are arbitrary and have no significance.
